# Supplementary material for: Exploration of scalp surface lipids reveals squalene peroxide as a potential actor in dandruff condition
Source: PubMed Central journal article supplement (PMC4796319; doi:10.1007/s00403-016-1623-1), 2016-02-03
Supplement: 403_2016_1623_MOESM2_ESM.pdf [file 403_2016_1623_MOESM2_ESM.pdf]

**Article Title:** Exploration of scalp surface lipids reveals squalene peroxide as a potential actor in dandruff condition

**Journal:** Archives of Dermatological Research

**Authors:** Roland Jourdain, Alain Moga, Philippe Vingler, Charles el Rawadi, Florence Pouradier, Luc Souverain, Philippe Bastien, Nicolas Amalric, Lionel Breton

**Corresponding Author:** Roland Jourdain - L'OREAL Research & Innovation, Aulnay-sous-Bois, France - Email: [rjourdain@rd.loreal.com](mailto:rjourdain@rd.loreal.com)

## Supplementary Tables

**Supplementary Table 1** Scalp surface biomarkers that were quantitatively assessed

| Biomarkers          | Common name                 |
|---------------------|-----------------------------|
| Catalase            | NA                          |
| MDA                 | Malondialdehyde             |
| Vitamin E           | NA                          |
| Cholesterol         | NA                          |
| Squalene            | NA                          |
| SQOOH               | Squalene monohydroperoxide  |
| C10:0               | Decanoic acid               |
| C12:0               | Lauric acid                 |
| C12:0, branched     | 11-Methyldodecanoic acid    |
| C13:0, branched     | 12-Methyltridecanoic acid   |
| C13:1               | Tridecenoic acid            |
| C14:0               | Myristic acid               |
| C14:0, branched     | 13-Methyltetradecanoic acid |
| C14:1               | Tetradecenoic acid          |
| C14:1, branched     | 12-Methyltetradecanoic acid |
| C15:0               | Pentadecanoic acid          |
| C15:0, branched     | 14-Methylpentadecanoic acid |
| C15:1               | Pentadecenoic acid          |
| C15:1, branched     | 13-Methylpentadecanoic acid |
| C16:0               | Palmitic acid               |
| C16:1 $\Delta$ 6    | Sapienic acid               |
| C16:1 $\Delta$ 9    | Palmitoleic acid            |
| C17:0               | Heptadecanoic acid          |
| C17:1               | Heptadecenoic acid          |
| C18:0               | Stearic acid                |
| C18:1 $\Delta$ 8    | 8-Octadecenoic acid         |
| C18:1 $\Delta$ 9    | Oleic acid                  |
| C18:1 $\Delta$ 11   | 11-Octadecenoic acid        |
| C18:2 $\Delta$ 5,8  | Sebaleic acid               |
| C18:2 $\Delta$ 9,12 | Linoleic acid               |
| C20:0               | Arachidic acid              |
| C20:1               | Eicosenoic acid             |
| C22:0               | Behenic Acid                |

**Supplementary Table 2** Biochemical characterization of the cohort of 10 control and 10 dandruff-affected volunteers – Free fatty acids (in decreasing order of quantity)

|                         | Control cohort           |                          |                          | Dandruff-affected cohort |             |                  | Statistical analysis (p) |  |  |
|-------------------------|--------------------------|--------------------------|--------------------------|--------------------------|-------------|------------------|--------------------------|--|--|
|                         | Non-dandruff (ND)        | Non-dandruff zone (NDZ)  | Dandruff zone (DZ)       | Between groups           |             | Intra-individual |                          |  |  |
|                         |                          |                          |                          | ND vs NDZ                | ND vs DZ    | NDZ vs DZ        |                          |  |  |
| C16:0 (µg/mg)           | 149.5<br>(137.4 – 168.9) | 190.1<br>(152.2 – 215.2) | 166.5<br>(126.3 – 199.4) | 0.17                     | 0.50        | 0.56             |                          |  |  |
| C16:1 Δ6 (µg/mg)        | 52.2<br>(40.5 – 65.7)    | 65.1<br>(53.0 – 71.7)    | 52.3<br>(37.3 – 71.6)    | 0.41                     | 0.94        | 0.28             |                          |  |  |
| C14:0 (µg/mg)           | 31.8<br>(28.5 – 38.2)    | 41.7<br>(37.1 – 46.1)    | 38.4<br>(29.1 – 40.8)    | 0.15                     | 0.65        | 0.06             |                          |  |  |
| C15:0 (µg/mg)           | 32.0<br>(26.5 – 37.0)    | 36.6<br>(28.5 – 41.4)    | 31.1<br>(28.4 – 40.0)    | 0.41                     | 1.00        | 0.70             |                          |  |  |
| C18:1 Δ8 (µg/mg)        | 22.8<br>(18.2 – 29.3)    | 31.7<br>(19.5 – 35.5)    | 24.3<br>(15.6 – 36.5)    | 0.23                     | 0.65        | 0.11             |                          |  |  |
| C18:0 (µg/mg)           | 21.9<br>(20.4 – 26.0)    | 25.8<br>(24.9 – 28.3)    | 25.7<br>(21.4 – 27.0)    | 0.13                     | 0.33        | 0.49             |                          |  |  |
| C17:0 (µg/mg)           | 7.4<br>(5.9 – 10.1)      | 9.9<br>(7.2 – 13.6)      | 8.5<br>(7.4 – 12.3)      | 0.23                     | 0.45        | 0.43             |                          |  |  |
| C18:2 Δ5,8 (µg/mg)      | 7.7<br>(5.5 – 8.7)       | 7.9<br>(6.0 – 9.0)       | 8.3<br>(5.7 – 10.7)      | 0.65                     | 0.60        | 0.85             |                          |  |  |
| C17:1 (µg/mg)           | 6.7<br>(4.8 – 8.7)       | 7.5<br>(5.5 – 8.1)       | 6.2<br>(3.3 – 10.8)      | 0.71                     | 0.88        | 0.56             |                          |  |  |
| C14:1, branched (µg/mg) | 5.1<br>(4.1 – 6.9)       | 7.1<br>(6.5 – 7.6)       | 5.9<br>(5.4 – 6.5)       | 0.15                     | 0.41        | 0.11             |                          |  |  |
| C18:2 Δ9,12 (µg/mg)     | 4.7<br>(3.9 – 7.5)       | 5.5<br>(4.3 – 6.1)       | 5.4<br>(3.8 – 10.6)      | 0.55                     | 0.50        | 0.85             |                          |  |  |
| C22:0 (µg/mg)           | 4.1<br>(3.7 – 7.1)       | 4.4<br>(3.2 – 5.3)       | 4.2<br>(3.1 – 9.9)       | 0.76                     | 0.88        | 0.56             |                          |  |  |
| C15:1 (µg/mg)           | 4.0<br>(2.0 – 5.1)       | 4.0<br>(3.5 – 4.3)       | 3.3<br>(2.8 – 4.5)       | 0.88                     | 0.41        | 0.37             |                          |  |  |
| C14:1 (µg/mg)           | 3.9<br>(3.0 – 4.7)       | 4.0<br>(3.8 – 5.1)       | 3.6<br>(3.4 – 3.9)       | 0.60                     | 0.41        | <b>0.02</b>      |                          |  |  |
| C15:1, branched (µg/mg) | 2.8<br>(1.7 – 4.6)       | 4.7<br>(2.6 – 7.5)       | 3.4<br>(2.3 – 7.1)       | 0.11                     | 0.36        | <b>0.01</b>      |                          |  |  |
| C14:0, branched (µg/mg) | 2.8<br>(2.1 – 3.7)       | 3.1<br>(2.7 – 3.9)       | 2.7<br>(2.6 – 3.5)       | 0.45                     | 0.76        | 0.07             |                          |  |  |
| C18:1 Δ9 (µg/mg)        | 2.3<br>(1.7 – 3.1)       | 3.9<br>(3.1 – 4.3)       | 3.6<br>(2.7 – 5.2)       | <b>0.01</b>              | <b>0.02</b> | 0.92             |                          |  |  |
| C15:0, branched (µg/mg) | 2.3<br>(1.6 – 2.9)       | 2.3<br>(2.2 – 2.5)       | 2.3<br>(1.8 – 2.6)       | 0.65                     | 0.76        | 0.49             |                          |  |  |
| C13:1 (µg/mg)           | 1.2<br>(0.8 – 4.0)       | 3.5<br>(0.8 – 5.4)       | 2.3<br>(0.8 – 2.6)       | 0.26                     | 0.55        | <b>0.01</b>      |                          |  |  |
| C20:0 (µg/mg)           | 1.2<br>(0.7 – 1.7)       | 0.8<br>(0.4 – 1.0)       | 0.7<br>(0.6 – 0.8)       | 0.07                     | 0.06        | 0.77             |                          |  |  |
| C12:0 (µg/mg)           | 0.9<br>(0.9 – 1.3)       | 1.0<br>(0.9 – 1.2)       | 1.2<br>(0.8 – 1.3)       | 0.50                     | 0.54        | 1.00             |                          |  |  |

|                                                  |                   |                  |                  |      |             |      |
|--------------------------------------------------|-------------------|------------------|------------------|------|-------------|------|
| C13:0, branched<br>( $\mu\text{g}/\text{mg}$ )   | 0.9<br>(0.5–1.0)  | 0.8<br>(0.7–0.9) | 0.8<br>(0.6–1.2) | 0.94 | 0.76        | 0.77 |
| C12:0, branched<br>( $\mu\text{g}/\text{mg}$ )   | 0.8<br>(0.6–0.9)  | 0.7<br>(0.7–0.8) | 0.8<br>(0.6–1.0) | 0.88 | 0.50        | 0.70 |
| C20:1<br>( $\mu\text{g}/\text{mg}$ )             | 0.7<br>(0.0–2.2)  | 0.9<br>(0.0–2.4) | 1.6<br>(0.0–2.4) | 0.72 | 0.53        | 0.69 |
| C16:1 $\Delta$ 9<br>( $\mu\text{g}/\text{mg}$ )  | 0.7<br>(0.5–1.0)  | 0.8<br>(0.6–0.9) | 0.8<br>(0.8–1.2) | 0.36 | 0.26        | 0.92 |
| C18:1 $\Delta$ 11<br>( $\mu\text{g}/\text{mg}$ ) | 0.5<br>(0.3–0.6)  | 0.7<br>(0.3–0.8) | 0.7<br>(0.4–0.9) | 0.33 | 0.06        | 1.00 |
| C10:0<br>( $\mu\text{g}/\text{mg}$ )             | 0.3<br>(0.0–0.7)  | 0.0<br>(0.0–0.2) | 0.0<br>(0.0–0.2) | 0.10 | 0.19        | 1.00 |
| <hr/>                                            |                   |                  |                  |      |             |      |
| ratio<br>C18:0/C18:1 $\Delta$ 9                  | 9.5<br>(8.2–12.5) | 6.8<br>(6.6–8.2) | 6.6<br>(5.2–7.9) | 0.06 | <b>0.02</b> | 0.19 |
| ratio<br>C16:0/C16:1 $\Delta$ 6                  | 2.9<br>(2.7–3.5)  | 3.0<br>(2.8–3.2) | 3.3<br>(2.9–3.4) | 0.71 | 0.26        | 0.08 |
| ratio saturated/<br>unsaturated                  | 2.3<br>(2.1–2.5)  | 2.3<br>(2.2–2.6) | 2.3<br>(2.2–2.5) | 0.60 | 0.50        | 0.19 |

Values described are medians (*interquartile ranges*), with *p* values which are only exact for comparisons between groups. Significant *p* values are bolded. Free fatty acid ratio values are listed at the end of the table and are separated by a dashed line.

**Supplementary Table 3** Biochemical characterization of the cohort of 10 control and 10 dandruff-affected volunteers – Bound fatty acids (in decreasing order of quantity)

|                                                    | Control cohort         |                         |                       | Dandruff-affected cohort |             |                  | Statistical analysis (p) |  |  |
|----------------------------------------------------|------------------------|-------------------------|-----------------------|--------------------------|-------------|------------------|--------------------------|--|--|
|                                                    | Non-dandruff (ND)      | Non-dandruff zone (NDZ) | Dandruff zone (DZ)    | Between groups           |             | Intra-individual |                          |  |  |
|                                                    |                        |                         |                       | ND vs NDZ                | ND vs DZ    | NDZ vs DZ        |                          |  |  |
| C16:0<br>( $\mu\text{g}/\text{mg}$ )               | 70.4<br>(50.6 – 106.4) | 45.9<br>(37.0 – 56.3)   | 52.0<br>(45.2 – 80.0) | 0.06                     | 0.41        | 0.08             |                          |  |  |
| C16:1 $\Delta$ 6<br>( $\mu\text{g}/\text{mg}$ )    | 30.5<br>(21.4 – 45.8)  | 20.9<br>(18.6 – 21.8)   | 20.7<br>(18.8 – 24.2) | 0.07                     | 0.06        | 0.85             |                          |  |  |
| C18:0<br>( $\mu\text{g}/\text{mg}$ )               | 23.0<br>(18.8 – 28.8)  | 17.0<br>(14.4 – 20.0)   | 18.3<br>(12.0 – 37.1) | 0.17                     | 0.50        | 0.16             |                          |  |  |
| C18:1 $\Delta$ 8<br>( $\mu\text{g}/\text{mg}$ )    | 14.4<br>(7.3 – 18.6)   | 8.9<br>(5.3 – 13.2)     | 11.3<br>(7.5 – 13.4)  | 0.17                     | 0.55        | 0.23             |                          |  |  |
| C15:0<br>( $\mu\text{g}/\text{mg}$ )               | 11.2<br>(6.0 – 14.5)   | 4.9<br>(4.2 – 9.5)      | 6.0<br>(5.3 – 6.8)    | <b>0.05</b>              | 0.17        | 0.32             |                          |  |  |
| C14:0<br>( $\mu\text{g}/\text{mg}$ )               | 9.3<br>(5.2 – 13.5)    | 6.8<br>(4.5 – 8.0)      | 10.1<br>(6.1 – 15.5)  | 0.22                     | 0.76        | <b>0.05</b>      |                          |  |  |
| C18:2 $\Delta$ 5,8<br>( $\mu\text{g}/\text{mg}$ )  | 6.6<br>(5.1 – 8.6)     | 5.3<br>(4.0 – 6.3)      | 5.3<br>(3.8 – 11.0)   | 0.29                     | 0.54        | 0.77             |                          |  |  |
| C18:2 $\Delta$ 9,12<br>( $\mu\text{g}/\text{mg}$ ) | 4.6<br>(3.8 – 7.5)     | 4.6<br>(3.4 – 5.5)      | 4.4<br>(3.2 – 11.0)   | 0.94                     | 0.94        | 0.92             |                          |  |  |
| C17:1<br>( $\mu\text{g}/\text{mg}$ )               | 4.4<br>(2.4 – 5.5)     | 2.0<br>(1.8 – 3.8)      | 2.3<br>(1.7 – 2.6)    | <b>0.04</b>              | 0.07        | 0.92             |                          |  |  |
| C22:0<br>( $\mu\text{g}/\text{mg}$ )               | 4.0<br>(3.5 – 6.9)     | 4.4<br>(2.9 – 5.1)      | 3.8<br>(2.7 – 9.3)    | 0.94                     | 0.94        | 1.00             |                          |  |  |
| C17:0<br>( $\mu\text{g}/\text{mg}$ )               | 3.8<br>(1.7 – 4.6)     | 2.0<br>(1.6 – 3.1)      | 2.5<br>(2.1 – 3.0)    | 0.26                     | 0.50        | <b>0.05</b>      |                          |  |  |
| C14:1, branched<br>( $\mu\text{g}/\text{mg}$ )     | 2.6<br>(1.8 – 4.4)     | 2.6<br>(1.4 – 3.2)      | 3.2<br>(1.9 – 7.6)    | 0.60                     | 0.50        | 0.11             |                          |  |  |
| C15:1<br>( $\mu\text{g}/\text{mg}$ )               | 2.1<br>(1.6 – 2.3)     | 1.3<br>(1.1 – 1.6)      | 1.4<br>(1.3 – 1.6)    | <b>0.03</b>              | <b>0.02</b> | 0.77             |                          |  |  |
| C18:1 $\Delta$ 9<br>( $\mu\text{g}/\text{mg}$ )    | 1.9<br>(1.6 – 2.1)     | 1.7<br>(1.5 – 2.0)      | 1.9<br>(1.4 – 4.0)    | 0.55                     | 0.33        | 0.08             |                          |  |  |
| C14:0, branched<br>( $\mu\text{g}/\text{mg}$ )     | 1.5<br>(1.3 – 1.8)     | 1.2<br>(0.9 – 1.6)      | 1.8<br>(0.8 – 2.2)    | 0.23                     | 0.94        | 0.11             |                          |  |  |
| C14:1<br>( $\mu\text{g}/\text{mg}$ )               | 1.5<br>(1.3 – 1.9)     | 1.3<br>(0.9 – 1.6)      | 1.4<br>(1.2 – 1.9)    | 0.20                     | 0.50        | 0.32             |                          |  |  |
| C15:1, branched<br>( $\mu\text{g}/\text{mg}$ )     | 1.3<br>(1.0 – 2.0)     | 1.3<br>(0.8 – 2.4)      | 1.5<br>(0.7 – 2.4)    | 0.94                     | 0.82        | 0.70             |                          |  |  |
| C15:0, branched<br>( $\mu\text{g}/\text{mg}$ )     | 1.3<br>(1.2 – 1.6)     | 0.8<br>(0.6 – 1.1)      | 1.0<br>(0.7 – 1.6)    | <b>0.05</b>              | 0.15        | <b>0.04</b>      |                          |  |  |
| C13:1<br>( $\mu\text{g}/\text{mg}$ )               | 0.6<br>(0.3 – 1.1)     | 0.7<br>(0.4 – 0.8)      | 0.5<br>(0.3 – 1.1)    | 1.00                     | 0.79        | 0.92             |                          |  |  |
| C16:1 $\Delta$ 9<br>( $\mu\text{g}/\text{mg}$ )    | 0.6<br>(0.4 – 0.9)     | 0.5<br>(0.4 – 0.6)      | 0.4<br>(0.3 – 0.8)    | 0.65                     | 0.36        | 1.00             |                          |  |  |
| C13:0, branched<br>( $\mu\text{g}/\text{mg}$ )     | 0.5<br>(0.4 – 0.9)     | 0.5<br>(0.3 – 0.8)      | 0.5<br>(0.3 – 1.3)    | 0.65                     | 0.65        | 0.70             |                          |  |  |

|                                 |                     |                    |                  |      |             |      |
|---------------------------------|---------------------|--------------------|------------------|------|-------------|------|
| C18:1 Δ11<br>(μg/mg)            | 0.3<br>(0.3–0.5)    | 0.3<br>(0.2–0.7)   | 0.4<br>(0.1–0.8) | 0.94 | 0.55        | 0.70 |
| C12:0, branched<br>(μg/mg)      | 0.4<br>(0.3–0.5)    | 0.2<br>(0.2–0.3)   | 0.2<br>(0.2–0.5) | 0.07 | 0.13        | 0.65 |
| C20:0<br>(μg/mg)                | 0.3<br>(0.3–0.6)    | 0.2<br>(0.1–0.5)   | 0.3<br>(0.1–0.4) | 0.13 | 0.33        | 0.56 |
| C12:0<br>(μg/mg)                | 0.3<br>(0.2–0.4)    | 0.1<br>(0.0–0.3)   | 0.1<br>(0.0–0.2) | 0.10 | 0.06        | 0.84 |
| C10:0<br>(μg/mg)                | 0.0<br>(0.0–0.4)    | 0.0<br>(0.0–0.0)   | 0.0<br>(0.0–0.2) | 0.62 | 0.96        | 0.87 |
| C20:1<br>(μg/mg)                | 0.0<br>(0.0–0.0)    | 0.0<br>(0.0–0.0)   | 0.0<br>(0.0–0.0) | NA   | NA          | NA   |
| ratio<br>C18:0/C18:1 Δ9         | 11.6<br>(10.1–13.2) | 10.0<br>(9.0–11.8) | 9.5<br>(7.2–9.9) | 0.13 | <b>0.02</b> | 0.63 |
| ratio<br>C16:0/C16:1 Δ6         | 2.2<br>(1.9–2.6)    | 2.1<br>(1.7–2.5)   | 2.3<br>(2.0–3.5) | 0.45 | 0.55        | 0.08 |
| ratio saturated/<br>unsaturated | 1.9<br>(1.7–2.1)    | 1.8<br>(1.6–2.1)   | 1.9<br>(1.6–2.2) | 0.85 | 0.91        | 0.31 |

Values described are medians (*interquartile ranges*), with *p* values which are only exact for comparisons between groups. Significant *p* values are bolded. Bound fatty acid ratio values are listed at the end of the table and are separated by a dashed line.

**Supplementary Table 4** Quantitative composition of face sebum versus scalp sebum using the novel sampling technique

| <b>Lipid species</b>                  | <b>Forehead<br/>(McGinley)</b> | <b>Forehead<br/>(In house)</b> | <b>Scalp<br/>(In house)</b> |
|---------------------------------------|--------------------------------|--------------------------------|-----------------------------|
| Free fatty acids                      | 16 %                           | 15 to 30 %                     | 30 to 50 %                  |
| Squalene & wax esters                 | 48 %                           | 30 to 50 %                     | 40 to 60 %                  |
| Cholesterol esters & free cholesterol | 6 %                            | < 10 %                         | < 10 %                      |
| Glycerides                            | 30 %                           | 30 to 50 %                     | 5 to 15 %                   |

Quantitative composition of face sebum versus scalp sebum using the novel sampling technique in healthy volunteers (n=6), compared to previously-published forehead results from McGinley et al [20].
