# Supplementary material for: Exploration of scalp surface lipids reveals squalene peroxide as a potential actor in dandruff condition
Source: PubMed Central journal article supplement (PMC4796319; doi:10.1007/s00403-016-1623-1), 2016-02-03
Supplement: 403_2016_1623_MOESM3_ESM.pdf [file 403_2016_1623_MOESM3_ESM.pdf]

**Article Title:** Exploration of scalp surface lipids reveals squalene peroxide as a potential actor in dandruff condition

**Journal:** Archives of Dermatological Research

**Authors:** Roland Jourdain, Alain Moga, Philippe Vingler, Charles el Rawadi, Florence Pouradier, Luc Souverain, Philippe Bastien, Nicolas Amalric, Lionel Breton

**Corresponding Author:** Roland Jourdain - L'OREAL Research & Innovation, Aulnay-sous-Bois, France - Email: rjourdain@rd.loreal.com

## Supplementary Figures

### Supplementary Figure 1 – MDA chromatographic profile

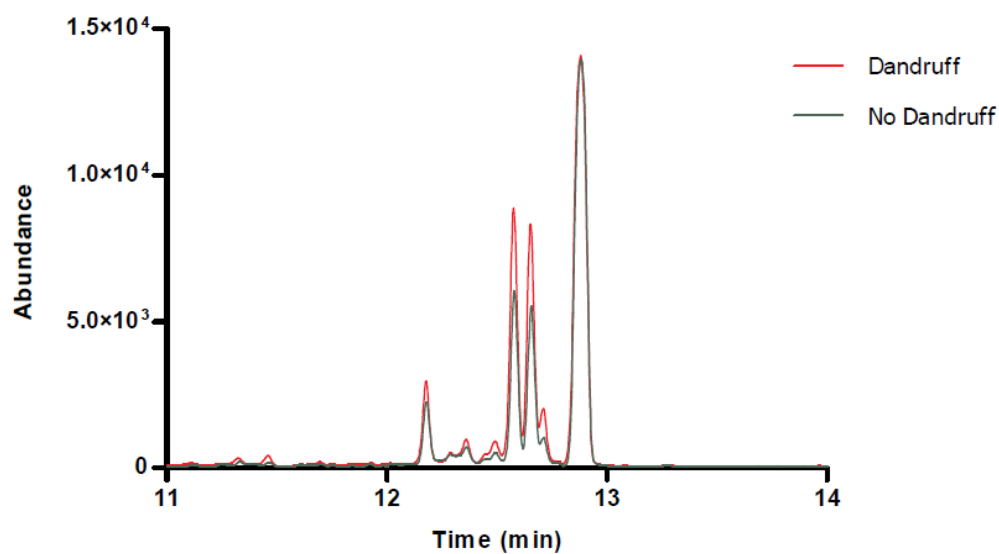

**Supplementary Fig.1** Chromatographic MDA profile of both dandruff and non-dandruff zones from a given dandruff subject, indicating an elevated amount of MDA at the dandruff zone

### Supplementary Figure 2 – Vitamin E chromatographic profile

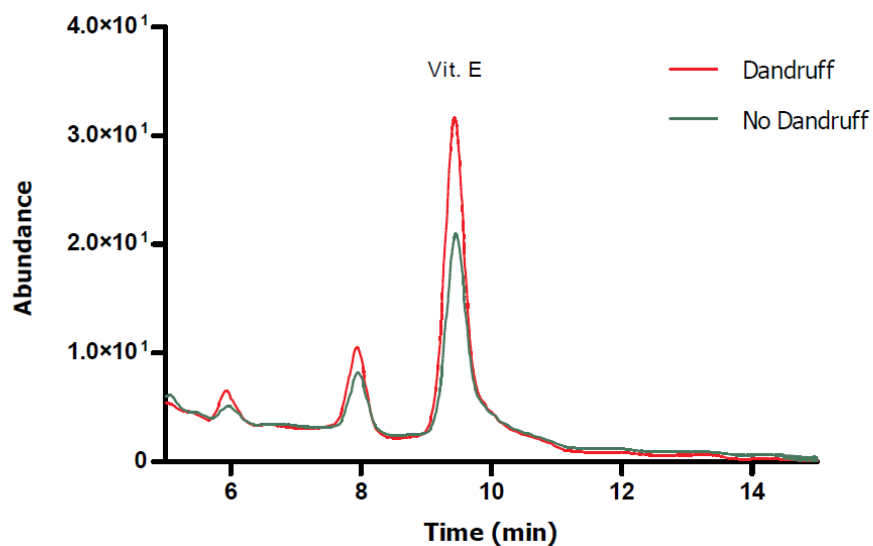

**Supplementary Fig.2** Chromatographic profile of vitamin E of both dandruff and non-dandruff zones from a given dandruff subject, indicating an elevated amount of vitamin E at the dandruff zone

**Supplementary Figure 3 – Free fatty acids chromatographic profile**

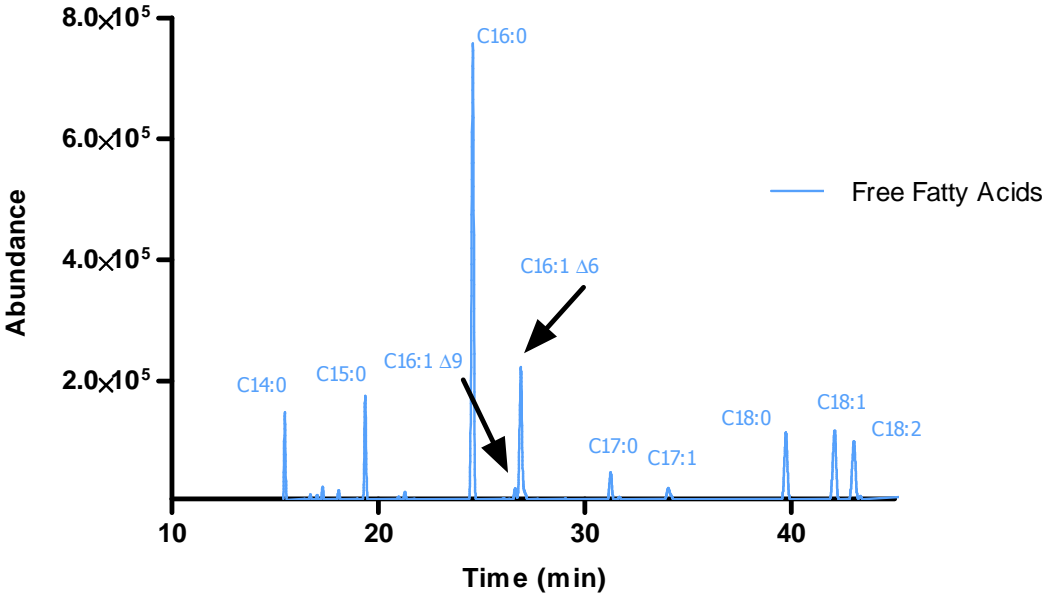

**Supplementary Fig.3** Chromatographic profile of free fatty acids of the dandruff zone from a given dandruff subject, illustrating their separation according to chain length and number of double bonds
